# Supplementary material
Source: ML conference proceedings conference paper supplement (https://proceedings.neurips.cc/paper_files/paper/2022/hash/77c7faab15002432ba1151e8d5cc389a-Abstract.html)
Supplement: Supplementary file 1 [file 77c7faab15002432ba1151e8d5cc389a-Supplemental-Conference.pdf]

## A Proof of (1)

**Lemma 2** (Optimization comparison lemma [35]). *Suppose*

$$x^* \in \operatorname{argmin}_x \varphi_1(x) + \varphi_0(x) \quad \text{and} \quad y^* \in \operatorname{argmin}_x \varphi_2(x) + \varphi_0(x). \quad (10)$$

for  $\varphi_1$  and  $\varphi_2$  differentiable and  $\varphi_0$  convex.

*Proof.* The (sub)differentiability assumptions and the optimality of  $x_{\varphi_1}$  and  $x_{\varphi_2}$  imply that  $0 \in \partial\varphi_2$  and  $u = 0 + \nabla(\varphi_1 - \varphi_2)(x_{\varphi_1})$  for some  $u \in x_{\varphi_2}$ . The gradient growth condition implies

$$\nu_{\varphi_2}(\|x_{\varphi_1} - x_{\varphi_2}\|_2) \leq \langle x_{\varphi_1} - x_{\varphi_2}, u - 0 \rangle = \langle x_{\varphi_1} - x_{\varphi_2}, \nabla(\varphi_2 - \varphi_1)(x_{\varphi_1}) \rangle. \quad (11)$$

□

**Lemma 3** (Learning guarantee for  $\hat{\theta}_n(\lambda)$ ). *Given,  $F_n$  satisfies Assumption 1 or 2 and any distribution  $\mathcal{D}$ , let  $S = \{z_i\}_{i=1}^n$  where  $S \sim \mathcal{D}^n$ . Then the empirical minimizer  $\hat{\theta}_n(\lambda)$  of  $F_n(\theta, \lambda, z)$  satisfies*

$$\mathbb{E}[F(\hat{\theta}_n(\lambda)) - F(\theta^*(\lambda))] \leq \frac{4L^2}{\mu n}$$

*Proof.* Given  $F_n$  is  $\mu$ -strongly convex this follows from Claim 6.2 in [29]. □

### A.1 Proof of (6b): Closeness of $\hat{\theta}_n(\lambda)$ and $\hat{\theta}_{n,-U}(\lambda)$

Suppose we have deleted  $m$  users in a set  $U$ . Define  $\tilde{F}_{n,-U} = \frac{n-m}{n}F_{n,-U}$  where  $F_{n,-U} = \frac{1}{n-m} \sum_{i \notin U} f(z_i, \theta, \lambda)$  and note that  $\tilde{F}_{n,-U}$  and  $F_{n,-U}$  have the same minimizers. We will work with  $\tilde{F}_{n,-U}$ . By the optimizer comparison lemma 2 and strong convexity of  $F_n$

$$\begin{aligned} \mu \|\hat{\theta}_n(\lambda) - \hat{\theta}_{n,-U}(\lambda)\|_2^2 &\leq \langle \hat{\theta}_n(\lambda) - \hat{\theta}_{n,-U}(\lambda), \nabla F_n(z, \hat{\theta}_n(\lambda), \lambda) - \nabla \tilde{F}_{n,-U}(z, \hat{\theta}_n(\lambda), \lambda) \rangle \\ &= \frac{1}{n} \sum_{i \in U} \langle \hat{\theta}_n(\lambda) - \hat{\theta}_{n,-U}(\lambda), \nabla \ell(z_i, \hat{\theta}_n(\lambda)) \rangle \\ &\leq \frac{1}{n} \|\hat{\theta}_n(\lambda) - \hat{\theta}_{n,-U}(\lambda)\|_2 \sum_{i \in U} \|\nabla \ell(z_i, \hat{\theta}_n(\lambda))\|_2 \\ &\leq \frac{1}{n} \|\hat{\theta}_n(\lambda) - \hat{\theta}_{n,-U}(\lambda)\|_2 \cdot mL \end{aligned}$$

Dividing both sides by  $\|\hat{\theta}_n(\lambda) - \hat{\theta}_{n,-U}(\lambda)\|_2$  and rearranging gives the desired bound of

$$\|\hat{\theta}_n(\lambda) - \hat{\theta}_{n,-U}(\lambda)\|_2 \leq \frac{mL}{\mu n}$$

#### A.1.1 Proof of (6b): Closeness of $\hat{\theta}_{n,-U}(\lambda)$ and $\bar{\theta}_{n,-U}(\lambda)$

We define:

- $\psi_1 = \tilde{F}_{n,-U}(z, \theta, \lambda)$
- $\psi_2 = \langle \nabla \tilde{F}_{n,-U}(\hat{\theta}_n(\lambda)), \hat{\theta}_n(\lambda) - \theta \rangle + \langle \hat{\theta}_n(\lambda) - \theta, \nabla_{\theta}^2 \tilde{F}_{n,-U}(\hat{\theta}_n(\lambda))[\hat{\theta}_n(\lambda) - \theta] \rangle$
- $\psi_3 = \langle \nabla \tilde{F}_{n,-U}(\hat{\theta}_n(\lambda)), \hat{\theta}_n(\lambda) - \theta \rangle + \langle \hat{\theta}_n(\lambda) - \theta, \nabla_{\theta}^2 \tilde{F}_n(\hat{\theta}_n(\lambda))[\hat{\theta}_n(\lambda) - \theta] \rangle$
- $\hat{\theta}_{n,-U}(\lambda) = \operatorname{argmin} \psi_1(\theta)$ ,
- $\bar{\theta}_{n,-U}(\lambda) = \operatorname{argmin} \psi_3(\theta)$

The optimizer comparison theorem and strong convexity of  $F_n$  implies the following upper bound:

$$\begin{aligned} \frac{\mu}{2} \|\hat{\theta}_{n,-U}(\lambda) - \bar{\theta}_{n,-U}(\lambda)\|_2^2 &\leq \langle \hat{\theta}_{n,-U}(\lambda) - \bar{\theta}_{n,-U}(\lambda), \nabla(\psi_3 - \psi_1)(\hat{\theta}_{n,-U}(\lambda)) \rangle \\ &\leq \|\hat{\theta}_{n,-U}(\lambda) - \bar{\theta}_{n,-U}(\lambda)\|_2 \|\nabla(\psi_3 - \psi_1)(\hat{\theta}_{n,-U}(\lambda))\|_2 \end{aligned}$$

Dividing both sides by  $\|\hat{\theta}_{n,-U}(\lambda) - \tilde{\theta}_{n,-U}(\lambda)\|_2$  gives

$$\begin{aligned}
\frac{\mu}{2} \|\hat{\theta}_{n,-U}(\lambda) - \tilde{\theta}_{n,-U}(\lambda)\|_2 &\leq \|\nabla_{\theta}(\psi_3 - \psi_2)(\hat{\theta}_{n,-U}(\lambda)) - \nabla_{\theta}(\psi_2 - \psi_1)(\hat{\theta}_{n,-U}(\lambda))\|_2 \\
&\leq \|\nabla_{\theta}(\psi_3 - \psi_2)(\hat{\theta}_{n,-U}(\lambda))\|_2 + \|\nabla_{\theta}(\psi_2 - \psi_1)(\hat{\theta}_{n,-U}(\lambda))\|_2 \\
&\leq \|\nabla_{\theta}^2 \tilde{F}_n(\hat{\theta}_{n,-U}(\lambda)) - \nabla_{\theta}^2 \tilde{F}_{n,-U}(\hat{\theta}_{n,-U}(\lambda))\|_2 \|\hat{\theta}_n(\lambda) - \hat{\theta}_{n,-U}(\lambda)\|_2 \\
&\quad + \|\nabla_{\theta}(\psi_2 - \psi_1)(\hat{\theta}_{n,-U}(\lambda))\|_2 \\
&\leq \frac{m^2 CL}{\mu n^2} + \|\nabla_{\theta} \psi_2(\hat{\theta}_{n,-U}(\lambda)) - \nabla_{\theta} \psi_1(\hat{\theta}_{n,-U}(\lambda))\|_2 \\
&\stackrel{\textcircled{1}}{\leq} \frac{m^2 CL}{\mu n^2} + \frac{M}{2} \|\hat{\theta}_{n,-U}(\lambda) - \hat{\theta}_n(\lambda)\|_2^2 \\
&\leq \frac{m^2 CL}{\mu n^2} + \frac{M}{2} \cdot \frac{m^2 L^2}{\mu^2 n^2}
\end{aligned}$$

Inequality  $\textcircled{1}$  follows from smoothness of the objective function. Dividing both sides by  $\frac{\mu}{2}$ , gives the desired bound of

$$\|\hat{\theta}_{n,-U}(\lambda) - \tilde{\theta}_{n,-U}(\lambda)\|_2 \leq \frac{2m^2 CL}{\mu^2 n^2} + \frac{Mm^2 L^2}{\mu^3 n^2}$$

For the non-smooth version of our algorithm, the same proof holds where we define

- $\psi_1 = \tilde{\ell}_{n,-U}(z, \theta, \lambda)$
- $\psi_2 = \langle \nabla \tilde{\ell}_{n,-U}(\hat{\theta}_n(\lambda)), \hat{\theta}_n(\lambda) - \theta \rangle + \langle \hat{\theta}_n(\lambda) - \theta, \nabla_{\theta}^2 \tilde{\ell}_{n,-U}(\hat{\theta}_n(\lambda))[\hat{\theta}_n(\lambda) - \theta] \rangle + \pi(\theta)$
- $\psi_3 = \langle \nabla \tilde{\ell}_{n,-U}(\hat{\theta}_n(\lambda)), \hat{\theta}_n(\lambda) - \theta \rangle + \langle \hat{\theta}_n(\lambda) - \theta, \nabla_{\theta}^2 \tilde{\ell}_n(\hat{\theta}_n(\lambda))[\hat{\theta}_n(\lambda) - \theta] \rangle + \pi(\theta)$
- $\hat{\theta}_{n,-U}(\lambda) = \operatorname{argmin} \psi_1(\theta)$ ,
- $\tilde{\theta}_{n,-U}(\lambda) = \operatorname{argmin} \psi_3(\theta)$

$$\begin{aligned}
\frac{\mu}{2} \|\hat{\theta}_{n,-U}(\lambda) - \tilde{\theta}_{n,-U}(\lambda)\|_2 &\leq \|\nabla_{\theta}^2 \tilde{\ell}_n(\hat{\theta}_{n,-U}(\lambda)) - \nabla_{\theta}^2 \tilde{\ell}_{n,-U}(\hat{\theta}_{n,-U}(\lambda))\|_2 \|\hat{\theta}_n(\lambda) - \hat{\theta}_{n,-U}(\lambda)\|_2 \\
&\quad + \|\nabla_{\theta} \psi_2(\hat{\theta}_{n,-U}(\lambda)) - \nabla_{\theta} \psi_1(\hat{\theta}_{n,-U}(\lambda))\|_2 \\
&\leq \frac{m^2 CL}{\mu n^2} + \|\nabla_{\theta} \psi_2(\hat{\theta}_{n,-U}(\lambda)) - \nabla_{\theta} \psi_1(\hat{\theta}_{n,-U}(\lambda))\|_2 \\
&\leq \frac{m^2 CL}{\mu n^2} + \frac{M}{2} \|\hat{\theta}_{n,-U}(\lambda) - \hat{\theta}_n(\lambda)\|_2^2 \\
&\leq \frac{m^2 CL}{\mu n^2} + \frac{M}{2} \cdot \frac{m^2 L^2}{\mu^2 n^2}
\end{aligned}$$

## A.2 Comparisons between batch and streaming algorithm

We show that the batch and streaming version of the algorithms are equivalent.

**Case 1:  $\pi$  is smooth.** The bounds we have proved are for the minimizer of  $\varphi_3$ , namely

$$\begin{aligned}
\tilde{\theta}_{n,-U}(\lambda) &= \hat{\theta}_n(\lambda) - \nabla_{\theta}^2 \tilde{F}(\hat{\theta}_n(\lambda))^{-1} \nabla \tilde{F}_{n,-U}(\hat{\theta}_n(\lambda)) \\
&= \hat{\theta}_n(\lambda) + \frac{1}{n} \left( \frac{1}{n} \sum_{i=1}^n \nabla_{\theta}^2 F(z_i, \hat{\theta}_n(\lambda), \lambda) \right)^{-1} \sum_{i \in U} \nabla \ell(z_i, \hat{\theta}_n(\lambda))
\end{aligned}$$

Now suppose 1 datapoint (user  $j$ ) requests to be deleted. Then the streaming and batch algorithms agree, as the update becomes

$$\tilde{\theta}_{n,-i}(\lambda) = \hat{\theta}_n(\lambda) + \frac{1}{n} \left( \frac{1}{n} \sum_{i=1}^n \nabla_{\theta}^2 F(z_i, \hat{\theta}_n(\lambda), \lambda) \right)^{-1} \nabla \ell(z_i, \hat{\theta}_n(\lambda)).$$

Now suppose the algorithms are consistent for all deletion requests in the set  $U$ . When an additional user  $j$  requests to delete their data the streaming algorithm returns

$$\begin{aligned}
\tilde{\theta}_{n,-(U \cup \{j\})}(\lambda) &= \tilde{\theta}_{n,-U}(\lambda) + \frac{1}{n} \left( \frac{1}{n} \sum_{i=1}^n \nabla_{\theta}^2 F(z_i, \hat{\theta}_n(\lambda), \lambda) \right)^{-1} \nabla \ell(z_j, \hat{\theta}_n(\lambda)) \\
&= \hat{\theta}_n(\lambda) + \frac{1}{n} \left( \frac{1}{n} \sum_{i=1}^n \nabla_{\theta}^2 F(z_i, \hat{\theta}_n(\lambda), \lambda) \right)^{-1} \sum_{i \in U} \nabla \ell(z_i, \hat{\theta}_n(\lambda)) \\
&\quad + \frac{1}{n} \left( \frac{1}{n} \sum_{i=1}^n \nabla_{\theta}^2 F(z_i, \hat{\theta}_n(\lambda), \lambda) \right)^{-1} \nabla \ell(z_j, \hat{\theta}_n(\lambda)) \\
&= \hat{\theta}_n(\lambda) + \frac{1}{n} \left( \frac{1}{n} \sum_{i=1}^n \nabla_{\theta}^2 F(z_i, \hat{\theta}_n(\lambda), \lambda) \right)^{-1} \nabla \sum_{i \in (U \cup \{j\})} \ell(z_i, \hat{\theta}_n(\lambda))
\end{aligned}$$

which matches the batch version of the deletion algorithm. This inductive arguments show both batch and streaming algorithms are the same.

**Case 2:  $\pi$  is not smooth.** When  $\pi$  is not smooth, the minimizer of  $\varphi_3$  satisfies

$$\tilde{\theta}_{n, -(U \cup \{j\})}(\lambda) = \tilde{\theta}_{n, -U}(\lambda) + \frac{1}{n} \left( \frac{1}{n} \sum_{i=1}^n \nabla_{\theta}^2 F(z_i, \hat{\theta}_n(\lambda), \lambda) \right)^{-1} \nabla \ell(z_j, \hat{\theta}_n(\lambda)) + \lambda \nabla \pi(\tilde{\theta}_{n, -(U \cup \{j\})}(\lambda))$$

When 1 datapoint (user  $j$ ) requests to be deleted, the streaming and batch algorithms agree given  $U = \emptyset$ . Now suppose the algorithms are consistent for all deletion requests in the set  $U$ . When an additional user  $j$  requests to delete their data the streaming algorithm returns an estimator that satisfies

$$\begin{aligned} \bar{\theta}_{n, -(U \cup \{j\})}(\lambda) &= \bar{\theta}_{n, -U}(\lambda) + \frac{1}{n} H_{\ell}^{-1} \nabla \ell(z_j, \hat{\theta}_n(\lambda)) + \lambda H_{\ell}^{-1} \nabla (\bar{\theta}_{n, -(U \cup \{j\})}(\lambda)) \\ &= \hat{\theta}_n(\lambda) + \frac{1}{n} H_{\ell}^{-1} \nabla \sum_{i \in (U \cup \{j\})} \ell(z_i, \hat{\theta}_n(\lambda)) + \lambda H_{\ell}^{-1} \nabla (\bar{\theta}_{n, -(U \cup \{j\})}(\lambda)) \end{aligned}$$

which matches the batch version of the deletion algorithm. This inductive arguments show both batch and streaming algorithms are the same.

### A.3 Proof of excess empirical risk

Second, we prove the excess empirical risk of our unlearning algorithm (1).

*Proof.*

$$\begin{aligned} \mathbb{E}[F_n(\tilde{\theta}_{n, -U}(\lambda)) - F_n(\theta^*(\lambda))] &= \mathbb{E}[F_n(\tilde{\theta}_{n, -U}(\lambda)) - F_n(\hat{\theta}_n(\lambda)) + F_n(\hat{\theta}_n(\lambda)) - F_n(\theta^*(\lambda))] \\ &= \mathbb{E}[F_n(\tilde{\theta}_{n, -U}(\lambda)) - F_n(\hat{\theta}_n(\lambda))] + \mathbb{E}[F_n(\hat{\theta}_n(\lambda)) - F_n(\theta^*(\lambda))] \\ &\stackrel{\textcircled{1}}{\leq} \mathbb{E}[L \|\tilde{\theta}_{n, -U}(\lambda) - \hat{\theta}_n(\lambda)\|] + \frac{4L^2}{\mu n} \end{aligned}$$

where  $\textcircled{1}$  comes from Lemma 3 given that  $F_n$  satisfies Assumption 1 or 2.

Next we upper bound  $\mathbb{E}[\|\tilde{\theta}_{n, -U}(\lambda) - \hat{\theta}_n(\lambda)\|]$ :

$$\begin{aligned} \mathbb{E}[\|\tilde{\theta}_{n, -U}(\lambda) - \hat{\theta}_n(\lambda)\|] &= \mathbb{E}[\|\tilde{\theta}_{n, -U}(\lambda) - \hat{\theta}_{n, -U}(\lambda) + \hat{\theta}_{n, -U}(\lambda) - \hat{\theta}_n(\lambda)\|] \\ &= \mathbb{E}[\|\tilde{\theta}_{n, -U}(\lambda) - \hat{\theta}_{n, -U}(\lambda)\|] + \mathbb{E}[\|\hat{\theta}_{n, -U}(\lambda) - \hat{\theta}_n(\lambda)\|] \\ &\stackrel{\textcircled{2}}{\leq} \mathbb{E}[\|\tilde{\theta}_{n, -U}(\lambda) - \hat{\theta}_{n, -U}(\lambda)\|] + \frac{mL}{\mu n} \\ &\leq \mathbb{E}[\|\tilde{\theta}_{n, -U}(\lambda) - \hat{\theta}_{n, -U}(\lambda) + \sigma\|] + \frac{mL}{\mu n} \\ &\leq \mathbb{E}[\|\tilde{\theta}_{n, -U}(\lambda) - \hat{\theta}_{n, -U}(\lambda)\|] + \mathbb{E}[\|\sigma\|] + \frac{mL}{\mu n} \\ &\stackrel{\textcircled{3}}{\leq} \frac{2m^2 CL}{\mu^2 n^2} + \frac{Mm^2 L^2}{\mu^3 n^2} + \sqrt{dc} + \frac{mL}{\mu n} \\ &\leq \frac{2m^2 CL}{\mu^2 n^2} + \frac{Mm^2 L^2}{\mu^3 n^2} + \frac{\sqrt{d}\sqrt{2\ln(1.25/\delta)}}{\epsilon} \left( \frac{2m^2 CL}{\mu^2 n^2} + \frac{Mm^2 L^2}{\mu^3 n^2} \right) + \frac{mL}{\mu n} \end{aligned}$$

where  $\textcircled{2}$  comes from Lemma 1 and  $\textcircled{3}$  comes from Jensen's inequality and Lemma 1 (Equation 6b).

Now we substitute this back into our earlier bound:

$$\begin{aligned} \mathbb{E}[F_n(\tilde{\theta}_{n, -U}(\lambda)) - F_n(\theta^*(\lambda))] &\leq L \left( \frac{2m^2 CL}{\mu^2 n^2} + \frac{Mm^2 L^2}{\mu^3 n^2} + \frac{\sqrt{d}\sqrt{2\ln(1.25/\delta)}}{\epsilon} \left( \frac{2m^2 CL}{\mu^2 n^2} + \frac{Mm^2 L^2}{\mu^3 n^2} \right) + \frac{mL}{\mu n} \right) + \frac{4L^2}{\mu n} \\ &\leq \frac{2m^2 CL^2}{\mu^2 n^2} + \frac{Mm^2 L^3}{\mu^3 n^2} + \frac{\sqrt{d}\sqrt{2\ln(1.25/\delta)}}{\epsilon} \left( \frac{2m^2 CL^2}{\mu^2 n^2} + \frac{Mm^2 L^3}{\mu^3 n^2} \right) + \frac{mL^2}{\mu n} + \frac{4L^2}{\mu n} \\ &\leq \left( 1 + \frac{\sqrt{d}\sqrt{2\ln(1.25/\delta)}}{\epsilon} \right) \left( \frac{2m^2 CL^2}{\mu^2 n^2} + \frac{Mm^2 L^3}{\mu^3 n^2} \right) + \frac{4mL^2}{\mu n} \\ &\leq \left( 1 + \frac{\sqrt{d}\sqrt{2\ln(1.25/\delta)}}{\epsilon} \right) \left( \frac{(2C\mu + ML)m^2 L^2}{\mu^3 n^2} \right) + \frac{4mL^2}{\mu n} \end{aligned}$$

□

Finally, we prove that our unlearning algorithm (1) results in  $(\epsilon, \delta)$ -certifiable removal of datapoint  $\mathbf{z} \in U \subseteq S$ .

*Proof.* We use a similar technique to the proof of the differential privacy guarantee for the Gaussian mechanism ([9]).

Let  $\hat{\theta}_n(\lambda)$  be the output of learning algorithm  $A$  trained on dataset  $S$  and  $\tilde{\theta}_{n,-U}(\lambda)$  be the output of unlearning algorithm  $M$  run on the sequence of delete requests  $U$ ,  $\hat{\theta}_n(\lambda)$ , and the data statistics  $T(S)$ . We also note the output of  $M$  before adding noise as  $\bar{\theta}_{n,-U}(\lambda)$ . Finally, we denote  $\hat{\theta}_{n,-U}(\lambda)$  as the output of  $A$  trained on the dataset  $S \setminus U$ .

We note that in Algorithm 1 that  $\tilde{\theta}_{n,-U}(\lambda)$  is simply  $\tilde{\theta}_{n,-U}(\lambda) = \bar{\theta}_{n,-U}(\lambda) + \sigma$ . The noise  $\sigma$  is sampled from  $\mathcal{N}(0, c^2 I)$  with  $c = \|\hat{\theta}_{n,-U}(\lambda) - \bar{\theta}_{n,-U}(\lambda)\|_2 \cdot \frac{\sqrt{2\ln(1.25/\delta)}}{\epsilon}$ . Where  $\|\hat{\theta}_{n,-U}(\lambda) - \bar{\theta}_{n,-U}(\lambda)\|_2 \leq \frac{2m^2 CL}{n^2 \mu^2} + \frac{m^2 ML^2}{n^2 \mu^3}$  (6b). Following the same proof for the DP guarantee of the Gaussian mechanism as Dwork et al. [9] (Theorem A.1) given the noise is sampled from the previously described Gaussian distribution we get for any  $\Theta$ :

$$\begin{aligned} P(\hat{\theta}_{n,-U} \in \Theta) &\leq e^\epsilon P(\tilde{\theta}_{n,-U} \in \Theta) + \delta, \quad \text{and} \\ P(\tilde{\theta}_{n,-U} \in \Theta) &\leq e^\epsilon P(\hat{\theta}_{n,-U} \in \Theta) + \delta \end{aligned}$$

resulting in  $(\epsilon, \delta)$ -unlearning. □

## B Proof of Algorithm 1 Deletion Capacity

The upper bound on the excess risk (Theorem 1) implies that we can delete at least:

$$m_{\epsilon, \delta, \gamma}^{A, M}(d, n) \geq c \cdot \frac{n\sqrt{\epsilon}}{(d\log(1/\delta))^{\frac{1}{4}}}$$

where  $c$  depends on the properties of function  $F(z, \theta, \lambda)$ . We specifically derive the value of  $c$  below by substituting our deletion capacity bound as  $m$  into the empirical excess risk upper bound:

$$\mathbb{E}[F(\tilde{\theta}_{n,-U}(\lambda)) - F(\theta^*(\lambda))] = O\left(\frac{(2C\mu + ML)L^2 m^2}{\mu^3 n^2} \frac{\sqrt{d}\sqrt{\ln(1/\delta)}}{\epsilon} + \frac{4mL^2}{\mu n}\right) \quad (12)$$

Plugging in the deletion capacity bound  $m = c \cdot \frac{n\sqrt{\epsilon}}{(d\log(1/\delta))^{\frac{1}{4}}}$  into the excess risk bound (12) then

$$\begin{aligned} \frac{(2C\mu + ML)L^2 m^2}{\mu^3 n^2} \frac{\sqrt{d}\sqrt{\ln(1/\delta)}}{\epsilon} + \frac{4mL^2}{\mu n} &= \frac{c^2(2C\mu + ML)L^2}{\mu^3} + \frac{4L^2 c}{\mu} \frac{n\sqrt{\epsilon}}{(d\log(1/\delta))^{\frac{1}{4}}} \\ &\leq c \left( \frac{c(2C\mu + ML)L^2}{\mu^3} + \frac{4L^2}{\mu} \right) \end{aligned}$$

Therefore,

$$c \leq \gamma \left( \frac{\mu^3}{(2C\mu + ML)L^2} + \frac{\mu}{4L^2} \right) \implies \mathbb{E}[F(\tilde{\theta}_{n,-U}(\lambda)) - F(\theta^*(\lambda))] \leq \gamma$$

given  $c \leq 1$ . Note that the third line follows from the fact that  $\frac{\sqrt{\epsilon}}{(d\log(1/\delta))^{\frac{1}{4}}} \leq 1$  given  $\epsilon \leq 1$  and  $\delta \leq 0.005$ .

## C Extension of non-smooth regularizer to [28]

Given a function  $F(z, \theta, \lambda)$  with a non-smooth regularizer  $\pi(\theta)$  which satisfies Assumption 2, the algorithm from Sekhari et al. [28] can use non-smooth regularizers with the same deletion capacity,

generalization, and unlearning guarantees as Algorithm 1. This follows from fact that the removal mechanism introduced by Sekhari et al. [28] minimizes  $\psi_2$  in Appendix A.1. Therefore the optimizer comparison theorem can be applied and the distance between the estimator and the leave-U-out estimator can be upper bounded by the same terms (more precisely, we can upper bound this distance by  $\frac{m^2 M L^2}{n^2 \mu^3}$ ).

## D Dataset Details

**MNIST** We consider digit classification from the MNIST dataset which contains 60000 images of digits from 1-9. We select only digits 3 and 8 to simplify the task to binary classification. We flatten the original images which are  $28 \times 28$  into a vector of 784 pixels. Additionally, we allow for either random sampling or *adaptive* sampling where the probability of sampling a 3 is set to 10% and the probability of sampling an 8 is set to 90%.

**SVHN** We consider digit recognition from street signs from the SVHN dataset which contains 60000 images of street sign images that contain digits from 1-9. We select only digits 3 and 8 to simplify the task to binary classification. We flatten the original images which are  $28 \times 28$  into a vector of 784 pixels. Additionally, we allow for either random sampling or *adaptive* sampling where the probability of sampling a 3 is set to 10% and the probability of sampling an 8 is set to 90%.

**Warfarin Dosing** Warfarin is a prescription drug used to treat symptoms stemming from blood clots (e.g. deep vein thrombosis) and to help reduce the incidence of stroke and heart attack in at-risk patients. It is an anticoagulant which inhibits blood clotting but overdosing leads to excessive bleeding. The appropriate dosage for a patient dependent on demographic and physiologic factors resulting in high variance between patients. We focus on predicting small or large dosages for patients (defined as  $> 30\text{mg/week}$ ) from a dataset released by the International Warfarin Pharmacogenetics Consortium [8] which contains both demographic and physiological measurements for patients. The dataset contains 5528 examples each with 62 features.

## E Additional Experiments

**Logistic Regression with Smooth Regularizers** We present the test accuracy results for the remaining values of  $\lambda = \{10^{-4}, 10^{-5}, 10^{-6}\}$ .

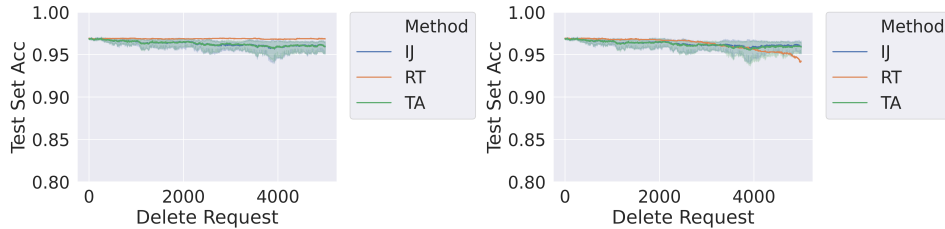

**Figure 4: IJ vs. RT and TA for smooth regularizers.** Comparing both the test accuracy of the unlearned models in our  $\ell_2$  logistic regression setup for  $\lambda = 10^{-4}$  for random vs adaptive sampling.

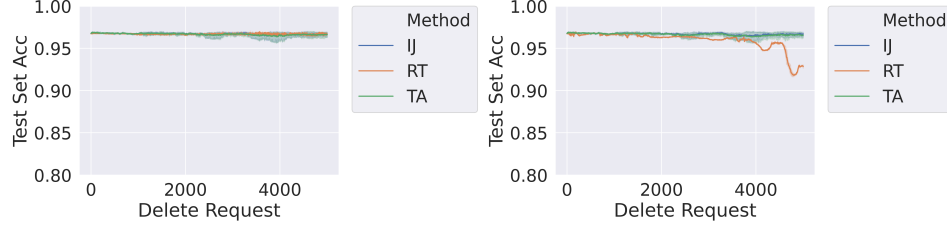

**Figure 5: IJ vs. RT and TA for smooth regularizers.** Comparing both the test accuracy of the unlearned models in our  $\ell_2$  logistic regression setup for  $\lambda = 10^{-5}$  for random vs adaptive sampling.

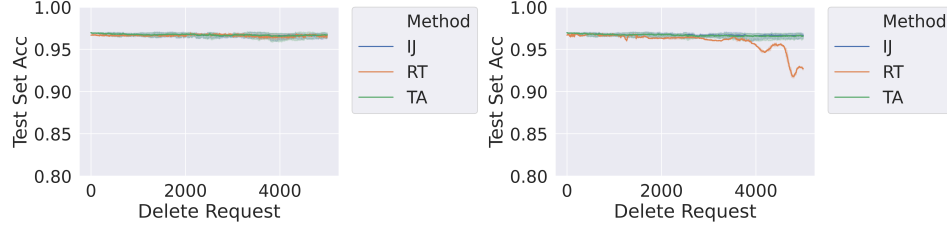

**Figure 6: IJ vs. RT and TA for smooth regularizers.** Comparing both the test accuracy of the unlearned models in our  $\ell_2$  logistic regression setup for  $\lambda = 10^{-6}$  for random vs adaptive sampling.

**Logistic Regression with Non-Smooth Regularizers** We present the test accuracy results for the remaining values of  $\lambda = \{10^{-4}, 10^{-5}, 10^{-6}\}$ .

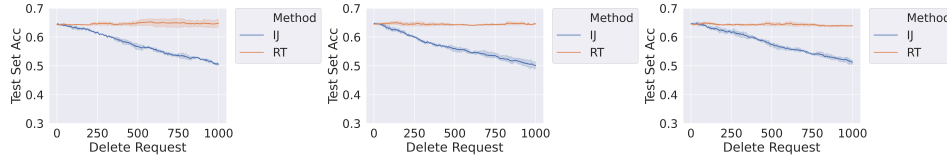

**Figure 7: IJ vs. RT for non-smooth regularizers.** Comparing the test accuracy of the unlearned models in our  $\ell_1$  logistic regression setup for  $\lambda \in \{10^{-4}, 10^{-5}, 10^{-6}\}$ .

**Non-Convex: Logistic Regression with Differentially Private Feature Extractor** We present the test accuracy results for the remaining values of  $\lambda = \{10^{-4}, 10^{-5}, 10^{-6}\}$ .

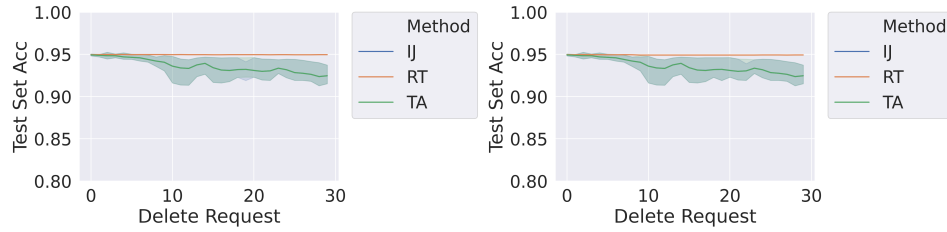

**Figure 8: IJ vs. TA and RT for non-convex training.** Comparing both the test accuracy of the unlearned models in our DP feature extractor +  $\ell_2$  setup for  $\lambda = 10^{-4}$ .

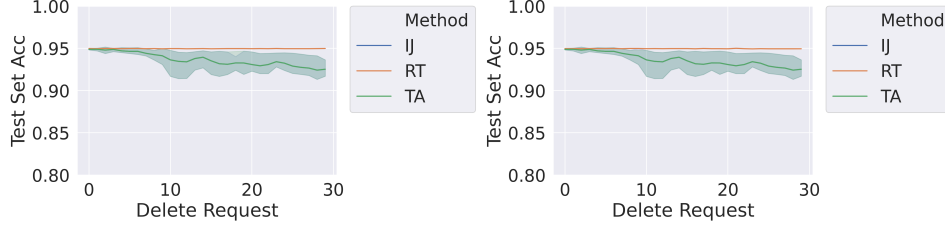

**Figure 9: IJ vs. TA and RT for non-convex training.** Comparing both the test accuracy of the unlearned models in our DP feature extractor +  $\ell_2$  setup for  $\lambda = 10^{-5}$ .

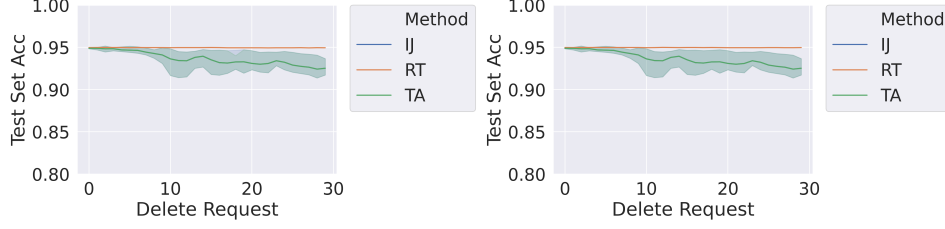

**Figure 10: IJ vs. TA and RT for non-convex training.** Comparing both the test accuracy of the unlearned models in our DP feature extractor +  $\ell_2$  setup for  $\lambda = 10^{-6}$ .

## E.1 Runtimes

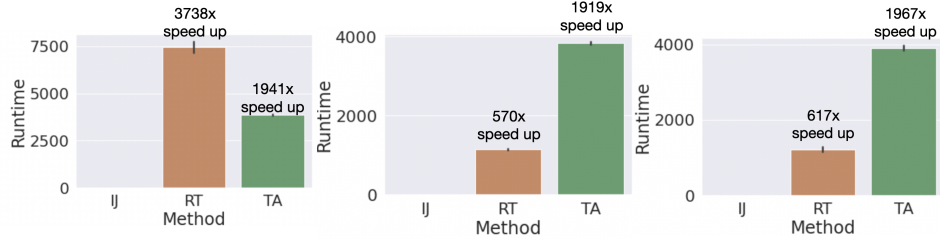

**Figure 11: IJ vs. RT vs. TA for smooth regularizers on MNIST.** Demonstrating runtime improvements across different hyperparameter settings of  $10^{-4}$ ,  $10^{-5}$ ,  $10^{-6}$ .

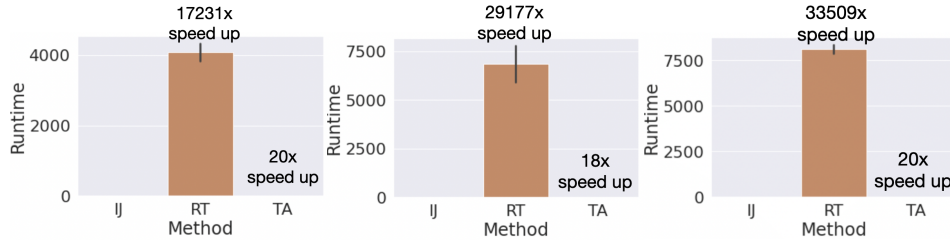

**Figure 12: IJ vs. RT vs. TA for non-convex settings on SVHN.** Demonstrating runtime improvements across different hyperparameter settings of  $10^{-4}$ ,  $10^{-5}$ ,  $10^{-6}$ .

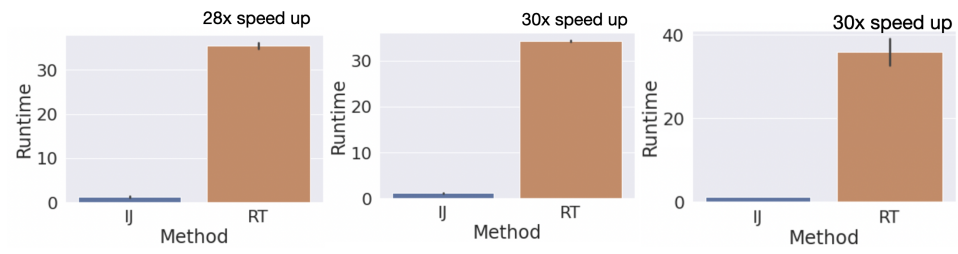

**Figure 13:** IJ vs. RT for non-smooth settings on Warfarin. Demonstrating runtime improvements across different hyperparameter settings of  $10^{-4}$ ,  $10^{-5}$ ,  $10^{-6}$ .
